# Supplementary material for: Cyclodextrins permeabilize DPPC liposome membranes: a focus on cholesterol content, cyclodextrin type, and concentration
Source: publisher site journal article supplement (doi:10.3762/bjoc.19.115), 2023-10-17
Supplement: Additional file 1 [file 1860-5397-19-115-S1.pdf]

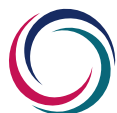

## Supporting Information

for

### **Cyclodextrins permeabilize DPPC liposome membranes: a focus on cholesterol content, cyclodextrin type, and concentration**

Ghenwa Nasr, H el ene Greige-Gerges, Sophie Fourmentin, Abdelhamid Elaissari and Nathalie Khreich

*Beilstein J. Org. Chem.* **2023**, *19*, 1570–1579. [doi:10.3762/bjoc.19.115](https://doi.org/10.3762/bjoc.19.115)

## Supporting tables

**Table S1:** The SRB release values obtained at  $t_0$ , 4 h and 24 h for  $\alpha$ -CD-treated liposomes of different CHOL contents and different CD/DPPC molar ratios.

The SRB release value of blank liposomes was 0% at  $t_0$  for the different formulations. Values are expressed as the means of three different measurements  $\pm$  SD (\* indicates a value of  $p < 0.05$  statistically significant. The  $p$  values compare the membrane permeability in the presence of CD to that of the respective blank).

| Time                                     | DPPC/CHOL (100:10) |                   |                   | DPPC/CHOL (100:25) |                   |                   | DPPC/CHOL (100:50) |                   |                   | DPPC/CHOL (100:100) |                   |                   |
|------------------------------------------|--------------------|-------------------|-------------------|--------------------|-------------------|-------------------|--------------------|-------------------|-------------------|---------------------|-------------------|-------------------|
|                                          | 0 h                | 4 h               | 24 h              | 0 h                | 4 h               | 24 h              | 0 h                | 4 h               | 24 h              | 0 h                 | 4 h               | 24 h              |
| <b>Blank</b>                             | 0                  | 43.64 $\pm$ 1.84  | 48.34 $\pm$ 1.73  | 0                  | 12.60 $\pm$ 1.28  | 15.01 $\pm$ 1.35  | 0                  | 3.13 $\pm$ 0.79   | 4.17 $\pm$ 1.26   | 0                   | 2.41 $\pm$ 0.70   | 5.15 $\pm$ 1.35   |
| <b><math>\alpha</math>-CD/DPPC 1:1</b>   | 2.20 $\pm$ 0.39*   | 38.20 $\pm$ 0.97* | 42.19 $\pm$ 0.35* | 2.16 $\pm$ 0.42*   | 13.99 $\pm$ 0.72  | 15.13 $\pm$ 0.40  | 2.23 $\pm$ 0.53*   | 2.31 $\pm$ 0.30   | 3.14 $\pm$ 0.13   | 1.06 $\pm$ 0.12     | 2.46 $\pm$ 0.86   | 5.20 $\pm$ 0.34   |
| <b><math>\alpha</math>-CD/DPPC 10:1</b>  | 13.08 $\pm$ 0.38*  | 40.84 $\pm$ 0.86* | 42.76 $\pm$ 1.20* | 8.94 $\pm$ 0.82*   | 19.67 $\pm$ 0.17* | 23.85 $\pm$ 1.01* | 4.20 $\pm$ 0.39*   | 9.81 $\pm$ 0.27*  | 14.48 $\pm$ 0.43* | 2.95 $\pm$ 0.25*    | 4.27 $\pm$ 0.73*  | 6.85 $\pm$ 0.39*  |
| <b><math>\alpha</math>-CD/DPPC 100:1</b> | 15.00 $\pm$ 0.95*  | 45.70 $\pm$ 1.63  | 48.38 $\pm$ 1.87  | 23.01 $\pm$ 0.73*  | 40.16 $\pm$ 1.85* | 47.80 $\pm$ 0.85* | 18.50 $\pm$ 1.23*  | 34.55 $\pm$ 0.18* | 44.48 $\pm$ 1.45* | 13.29 $\pm$ 0.12*   | 30.50 $\pm$ 0.54* | 38.06 $\pm$ 0.74* |

**Table S2:** The SRB release values obtained at time  $t_0$ , 4, and 24 h for  $\beta$ -CD-treated liposomes at different CHOL content and different CD/DPPC molar ratios.

The SRB release value of blank liposomes was 0% at  $t_0$  for the different formulations. Values are expressed as the means of three different measurements  $\pm$  SD (\* indicates a value of  $p < 0.05$  statistically significant. The  $p$  values compare the membrane permeability in the presence of CD to that of the respective blank.)

| Time                                    | DPPC/CHOL (100:10) |                   |                   | DPPC/CHOL (100:25) |                   |                   | DPPC/CHOL (100:50) |                   |                   | DPPC/CHOL (100:100) |                  |                   |
|-----------------------------------------|--------------------|-------------------|-------------------|--------------------|-------------------|-------------------|--------------------|-------------------|-------------------|---------------------|------------------|-------------------|
|                                         | 0 h                | 4 h               | 24 h              | 0 h                | 4 h               | 24 h              | 0 h                | 4 h               | 24 h              | 0 h                 | 4 h              | 24 h              |
| <b>Blank</b>                            | 0                  | 43.64 $\pm$ 1.84  | 48.34 $\pm$ 1.73  | 0                  | 12.60 $\pm$ 1.28  | 15.01 $\pm$ 1.35  | 0                  | 3.13 $\pm$ 0.79   | 4.17 $\pm$ 1.26   | 0                   | 2.41 $\pm$ 0.70  | 5.15 $\pm$ 1.35   |
| <b><math>\beta</math>-CD/DPPC 1:1</b>   | 1.90 $\pm$ 0.09*   | 39.45 $\pm$ 1.03  | 44.05 $\pm$ 0.16  | 1.40 $\pm$ 0.25    | 14.24 $\pm$ 0.37  | 14.60 $\pm$ 0.59  | 2.50 $\pm$ 0.32*   | 2.14 $\pm$ 0.08   | 5.63 $\pm$ 0.25   | 1.28 $\pm$ 0.15     | 0.99 $\pm$ 0.43  | 7.02 $\pm$ 0.08   |
| <b><math>\beta</math>-CD/DPPC 10:1</b>  | 11.91 $\pm$ 1.28*  | 35.79 $\pm$ 0.81* | 40.85 $\pm$ 0.90* | 6.32 $\pm$ 0.20*   | 18.07 $\pm$ 0.82* | 21.45 $\pm$ 0.94* | 2.76 $\pm$ 0.28*   | 2.53 $\pm$ 0.01   | 7.93 $\pm$ 0.20*  | 1.75 $\pm$ 0.30*    | 2.16 $\pm$ 0.01  | 4.60 $\pm$ 0.24   |
| <b><math>\beta</math>-CD/DPPC 100:1</b> | 17.10 $\pm$ 0.83*  | 44.71 $\pm$ 1.23  | 49.20 $\pm$ 2.02  | 18.94 $\pm$ 1.48*  | 38.29 $\pm$ 1.89* | 39.78 $\pm$ 1.95* | 23.30 $\pm$ 0.63*  | 36.97 $\pm$ 0.33* | 45.85 $\pm$ 1.54* | 32.37 $\pm$ 0.90*   | 52.3 $\pm$ 1.00* | 57.71 $\pm$ 0.01* |

**Table S3:** The SRB release values obtained at  $t_0$ , 4, and 24 h for the  $\beta$ -CD derivatives-treated liposomes of different CHOL content and at different CD/DPPC molar ratios.

The SRB release value of blank liposomes was 0% at  $t_0$  for the different formulations. Values are expressed as the means of three different measurements  $\pm$  SD (\* indicates a value of  $p < 0.05$  statistically significant. The  $p$  values compare the membrane permeability in the presence of CD to that of the respective blank).

|                                  | DPPC/CHOL (100:10) |                  |                   | DPPC/CHOL (100:25) |                   |                   | DPPC/CHOL (100:50) |                   |                   | DPPC/CHOL (100:100) |                   |                   |
|----------------------------------|--------------------|------------------|-------------------|--------------------|-------------------|-------------------|--------------------|-------------------|-------------------|---------------------|-------------------|-------------------|
| Time                             | 0 h                | 4 h              | 24 h              | 0 h                | 4 h               | 24 h              | 0 h                | 4 h               | 24 h              | 0 h                 | 4 h               | 24 h              |
| <b>Blank</b>                     | 0                  | 43.64 $\pm$ 1.84 | 48.34 $\pm$ 1.73  | 0                  | 12.60 $\pm$ 1.28  | 15.01 $\pm$ 1.35  | 0                  | 3.13 $\pm$ 0.79   | 4.17 $\pm$ 1.26   | 0                   | 2.41 $\pm$ 0.70   | 5.15 $\pm$ 1.35   |
| <b>RAMEB</b>                     |                    |                  |                   |                    |                   |                   |                    |                   |                   |                     |                   |                   |
| <b>CD/DPPC 1:1</b>               | 3.20 $\pm$ 0.44*   | 39.22 $\pm$ 0.53 | 45.49 $\pm$ 0.19  | 2.46 $\pm$ 0.11*   | 13.73 $\pm$ 0.22  | 16.97 $\pm$ 0.83  | 3.50 $\pm$ 0.16*   | 2.09 $\pm$ 0.09   | 6.38 $\pm$ 0.30   | 1.06 $\pm$ 0.27     | 0.97 $\pm$ 0.18   | 6.34 $\pm$ 0.11   |
| <b>CD/DPPC 10:1</b>              | 13.32 $\pm$ 0.27*  | 43.99 $\pm$ 0.65 | 47.25 $\pm$ 0.06  | 9.39 $\pm$ 0.64*   | 19.32 $\pm$ 0.42* | 22.72 $\pm$ 1.02* | 4.78 $\pm$ 0.09*   | 8.35 $\pm$ 0.33*  | 11.04 $\pm$ 0.27* | 2.56 $\pm$ 0.37*    | 1.90 $\pm$ 0.21   | 3.47 $\pm$ 0.28   |
| <b>CD/DPPC 100:1</b>             | 28.70 $\pm$ 0.48*  | 46.06 $\pm$ 1.75 | 52.76 $\pm$ 1.51* | 23.80 $\pm$ 1.77*  | 38.13 $\pm$ 1.40* | 45.24 $\pm$ 1.87* | 27.50 $\pm$ 0.82*  | 43.51 $\pm$ 0.80* | 48.46 $\pm$ 0.23* | 40.74 $\pm$ 0.46*   | 52.00 $\pm$ 0.52* | 57.07 $\pm$ 0.24* |
| <b>CRYSMEB</b>                   |                    |                  |                   |                    |                   |                   |                    |                   |                   |                     |                   |                   |
| <b>CD/DPPC 1:1</b>               | 1.11 $\pm$ 0.53    | 41.81 $\pm$ 0.16 | 42.24 $\pm$ 0.28  | 2.57 $\pm$ 0.17*   | 13.53 $\pm$ 0.06  | 16.45 $\pm$ 0.17  | 1.21 $\pm$ 0.42    | 2.85 $\pm$ 0.78   | 5.89 $\pm$ 0.40   | 1.09 $\pm$ 0.14     | 1.72 $\pm$ 0.71   | 6.89 $\pm$ 0.07   |
| <b>CD/DPPC 10:1</b>              | 5.90 $\pm$ 0.14*   | 38.18 $\pm$ 0.06 | 40.21 $\pm$ 0.27  | 6.09 $\pm$ 0.38*   | 17.87 $\pm$ 0.01  | 21.64 $\pm$ 0.31* | 1.28 $\pm$ 0.10*   | 2.92 $\pm$ 0.05   | 6.64 $\pm$ 0.48*  | 1.85 $\pm$ 0.72*    | 0.59 $\pm$ 0.30   | 3.12 $\pm$ 0.93   |
| <b>CD/DPPC 100:1</b>             | 18.90 $\pm$ 0.68*  | 47.07 $\pm$ 1.72 | 47.55 $\pm$ 0.98  | 18.41 $\pm$ 1.05*  | 32.51 $\pm$ 1.35* | 36.54 $\pm$ 0.81* | 15.70 $\pm$ 0.56*  | 16.68 $\pm$ 1.70* | 26.34 $\pm$ 1.14* | 12.92 $\pm$ 0.82*   | 20.00 $\pm$ 0.71* | 20.88 $\pm$ 0.69* |
| <b>HP-<math>\beta</math>-CD</b>  |                    |                  |                   |                    |                   |                   |                    |                   |                   |                     |                   |                   |
| <b>CD/DPPC 1:1</b>               | 1.36 $\pm$ 0.43    | 38.30 $\pm$ 0.67 | 41.45 $\pm$ 0.71  | 1.12 $\pm$ 0.37    | 14.78 $\pm$ 0.29  | 14.28 $\pm$ 1.14  | 0.98 $\pm$ 0.08    | 1.66 $\pm$ 0.16   | 5.77 $\pm$ 0.21   | 1.26 $\pm$ 0.19     | 1.64 $\pm$ 0.36   | 9.56 $\pm$ 0.39   |
| <b>CD/DPPC 10:1</b>              | 6.86 $\pm$ 0.68*   | 39.40 $\pm$ 0.22 | 44.52 $\pm$ 0.63  | 5.36 $\pm$ 0.76*   | 15.17 $\pm$ 0.10  | 20.40 $\pm$ 0.89* | 2.61 $\pm$ 0.37*   | 3.64 $\pm$ 0.29*  | 3.02 $\pm$ 0.87*  | 2.18 $\pm$ 0.30*    | 2.30 $\pm$ 0.25   | 2.40 $\pm$ 0.51   |
| <b>CD/DPPC 100:1</b>             | 16.7 $\pm$ 0.48*   | 45.69 $\pm$ 2.39 | 49.35 $\pm$ 0.97  | 17.19 $\pm$ 1.04*  | 32.90 $\pm$ 0.76* | 36.70 $\pm$ 0.24* | 13.70 $\pm$ 0.50*  | 18.27 $\pm$ 0.27* | 23.71 $\pm$ 0.91* | 6.98 $\pm$ 0.25*    | 11.00 $\pm$ 0.64* | 12.91 $\pm$ 1.65* |
| <b>SBE-<math>\beta</math>-CD</b> |                    |                  |                   |                    |                   |                   |                    |                   |                   |                     |                   |                   |

|                      |               |              |              |               |               |               |              |               |               |               |               |               |
|----------------------|---------------|--------------|--------------|---------------|---------------|---------------|--------------|---------------|---------------|---------------|---------------|---------------|
| <b>CD/DPPC 1:1</b>   | 2.58 ± 0.29*  | 39.58 ± 0.15 | 42.52 ± 0.48 | 1.76 ± 0.10*  | 15.69 ± 0.58  | 14.08 ± 0.24  | 1.30 ± 0.45* | 2.96 ± 0.42   | 6.27 ± 0.15   | 0.73 ± 0.18   | 1.33 ± 0.32   | 7.46 ± 1.16   |
| <b>CD/DPPC 10:1</b>  | 7.11 ± 0.38*  | 41.52 ± 0.26 | 45.43 ± 0.41 | 5.94 ± 0.42*  | 16.27 ± 0.60  | 21.59 ± 1.12* | 3.21 ± 0.75* | 1.98 ± 0.71*  | 8.35 ± 0.27*  | 3.04 ± 0.44*  | 1.03 ± 0.08   | 3.71 ± 1.11   |
| <b>CD/DPPC 100:1</b> | 13.90 ± 0.53* | 48.37 ± 1.73 | 52.70 ± 0.54 | 16.64 ± 1.62* | 28.19 ± 1.06* | 31.36 ± 0.74* | 11.9 ± 0.18* | 20.25 ± 0.70* | 21.59 ± 0.80* | 10.71 ± 0.07* | 13.30 ± 0.87* | 14.32 ± 0.21* |

**Table S4:** The SRB release values obtained at time  $t_0$ , 4, and 24 h for  $\gamma$ -CD-treated liposomes at different CHOL content and different CD/DPPC molar ratios.

The SRB release value of blank liposomes was 0% at  $t_0$  for the different formulations. Values are expressed as the means of three different measurements  $\pm$  SD (\* indicates a value of  $p < 0.05$  statistically significant. The  $p$  values compare the membrane permeability in the presence of CD to that of the respective blank.)

| Time                       | DPPC/CHOL (100:10) |                  |                  | DPPC/CHOL (100:25) |                   |                   | DPPC/CHOL (100:50) |                  |                   | DPPC/CHOL (100:100) |                  |                  |
|----------------------------|--------------------|------------------|------------------|--------------------|-------------------|-------------------|--------------------|------------------|-------------------|---------------------|------------------|------------------|
|                            | 0 h                | 4 h              | 24 h             | 0 h                | 4 h               | 24 h              | 0 h                | 4 h              | 24 h              | 0 h                 | 4 h              | 24 h             |
| Blank                      | 0                  | 43.64 $\pm$ 1.84 | 48.34 $\pm$ 1.73 | 0                  | 12.60 $\pm$ 1.28  | 15.01 $\pm$ 1.35  | 0                  | 3.13 $\pm$ 0.79  | 4.17 $\pm$ 1.26   | 0                   | 2.41 $\pm$ 0.70  | 5.15 $\pm$ 1.35  |
| $\gamma$ -CD/DPPC<br>1/1   | 0.60 $\pm$ 0.11    | 43.49 $\pm$ 0.47 | 49.66 $\pm$ 0.81 | 0.74 $\pm$ 0.30    | 14.81 $\pm$ 0.12  | 17.07 $\pm$ 0.29  | 0.15 $\pm$ 0.05    | 1.50 $\pm$ 0.10  | 3.25 $\pm$ 0.66   | 0.13 $\pm$ 0.08     | 1.00 $\pm$ 0.11  | 6.04 $\pm$ 0.13  |
| $\gamma$ -CD/DPPC<br>10/1  | 2.57 $\pm$ 0.54*   | 32.95 $\pm$ 0.88 | 40.04 $\pm$ 0.59 | 1.04 $\pm$ 0.81    | 9.69 $\pm$ 0.34   | 14.38 $\pm$ 0.70  | 0.8 $\pm$ 0.12     | 1.5 $\pm$ 0.65   | 3.26 $\pm$ 0.73   | 0.45 $\pm$ 0.23     | 0.39 $\pm$ 0.20  | 3.66 $\pm$ 0.90  |
| $\gamma$ -CD/DPPC<br>100/1 | 6.90 $\pm$ 1.56*   | 39.29 $\pm$ 1.03 | 40.20 $\pm$ 1.84 | 2.63 $\pm$ 1.01*   | 23.18 $\pm$ 0.89* | 24.00 $\pm$ 0.81* | 2.70 $\pm$ 0.53*   | 6.04 $\pm$ 0.64* | 10.19 $\pm$ 0.26* | 1.76 $\pm$ 0.76     | 3.80 $\pm$ 0.23* | 6.01 $\pm$ 0.69* |
